# Supplementary material
Source: publisher site journal article supplement (https://www.dovepress.com/article/505855)
Supplement: Supplementary file 1 [file get_supplementary_file.php]

**Supplementary Materials**

**Manuscript Submission ID number: 505855**

**ORIGINAL RESEARCH**

**Yang Li et al**

**The impact of age and disease entity on small airway dysfunction in obstructive airway diseases**

**Yang Li 1, Kang-Cheng Su 1,2, Yi-Han Hsiao 1,2, Kun-Ta Chou 1,2, Yen-Jung Li 1, Tien-Hsin Jeng 1,3, Hsin-Kuo Ko 1,2, Diahn-Warng Perng 1,2,***

1 Department of Chest Medicine, Taipei Veterans General Hospital, Taipei, Taiwan 11217, ROC;

2 School of Medicine, College of Medicine, National Yang Ming Chiao Tung University, Taipei, Taiwan 11221, ROC

3 Division of Pulmonary Medicine, Department of Internal Medicine, Ditmanson Medical Foundation Chia-Yi Christian Hospital, Chia-Yi, Taiwan, 60002, ROC

**Table S1.** Factors associated with SAD (AX > 0.44 kPa/L) in patients with obstructive airway diseases

|  | **Univariate analysis** | | |  | **Multivariate analysis** | | | | | | | | |
| --- | --- | --- | --- | --- | --- | --- | --- | --- | --- | --- | --- | --- | --- |
|  |  |  |  |  | **Model 1*** | | |  | | **Model 2#** | | | |
| **Variable** | **OR** | **95% CI** | ***P* value** |  | **aOR** | **95% CI** | ***P* value** | |  | | **aOR** | **95% CI** | ***P* value** | |
| **Age (year)** | 1.0368 | 1.0204 to 1.0536 | **<0.0001** |  | 1.0297 | 1.0031 to 1.0571 | **0.0282** | |  | | 1.0340 | 1.0048 to 1.0641 | **0.0222** | |
| **Disease entity** |  |  |  |  |  |  |  | |  | |  |  |  | |
| YA | 0.3193 | 0.1809 to 0.5638 | **0.0001** |  | 0.0619 | 0.0619 to 0.0619 | **<0.0001** | |  | | 0.0392 | 0.0392 to 0.0392 | **<0.0001** | |
| EA | 1.8780 | 0.9594 to 3.6762 | 0.0659 |  | 0.0725 | 0.0725 to 0.0725 | **<0.0001** | |  | | 0.0364 | 0.0364 to 0.0364 | **<0.0001** | |
| COPD | 2.6881 | 1.2936 to 5.5859 | **0.0081** |  | 0.1062 | 0.1062 to 0.1062 | **<0.0001** | |  | | 0.1735 | N/A | 1.0000 | |
| **BMI (kg/m2)** | 1.0912 | 1.0139 to 1.1744 | **0.0199** |  | 1.0968 | 1.0182 to 1.1814 | **<0.0001** | |  | | 1.1048 | 1.0209 to 1.1954 | **0.0133** | |
| **Male** | 1.5768 | 0.9118 to 2.7268 | 0.1032 |  |  |  |  | |  | |  |  |  | |
| **Current smoker** | 3.1481 | 0.9205 to 10.7667 | 0.0676 |  |  |  |  | |  | | 0.1321 | N/A | 1.0000 | |
| **Smoking index (pack-years)** | 1.0211 | 1.0046 to 1.0378 | **0.0120** |  |  |  |  | |  | | 1.0095 | 0.9768 to 1.0433 | 0.5730 | |
| **FEV1 ≥ 80 % pred.** | 0.1547 | 0.0828 to 0.2890 | **<0.0001** |  |  |  |  | |  | | 0.1565 | 0.0784 to 0.3123 | **<0.0001** | |

YA, Younger asthmatics; EA, elderly asthmatics; COPD, chronic obstructive pulmonary disease; BMI, body mass index; FEV1, forced expiratory volume in one second; OR, odds ratio; aOR, adjusted odds ratio; CI, confidence interval; N/A, not available; *P* < 0.05 was shown in bold font. * Model 1 (n=277): adjusted by age, BMI, and disease entity (YA, EA, and COPD); # Model 2 (n=275): adjusted by age, BMI, disease entity (YA, EA, and COPD), smoking status (reference group = current smoker), smoking index (pack-years), Severity of disease (reference group = FEV1 ≥ 80 % pred. in spirometry). P < 0.05 was shown in bold font.

**Table S2.** Factors associated with SAD (FEF25-75% < 65% predicted) in patients with obstructive airway diseases

|  | **Univariate analysis** | | |  | **Multivariate analysis** | | | | | | | | |
| --- | --- | --- | --- | --- | --- | --- | --- | --- | --- | --- | --- | --- | --- |
|  |  |  |  |  | **Model 1*** | | |  | | **Model 2#** | | | |
| **Variable** | **OR** | **95% CI** | ***P* value** |  | **aOR** | **95% CI** | ***P* value** | |  | | **aOR** | **95% CI** | ***P* value** | |
| **Age (year)** | 1.0485 | 1.0310 to 1.0662 | **<0.0001** |  | 1.0240 | 0.9969 to 1.0518 | 0.0829 | |  | | 1.0446 | 1.0092 to 1.0813 | **0.0132** | |
| **Disease entity** |  |  |  |  |  |  |  | |  | |  |  |  | |
| YA | 0.1791 | 0.0999 to 0.3211 | **<0.0001** |  | 0.6703 | N/A | 1.0000 | |  | | 6.465E-29 |  | 1.0000 | |
| EA | 1.3949 | 0.7646 to 2.5447 | 0.2779 |  | 0.9162 | N/A | 1.0000 | |  | | 4.6324E-29 |  | 1.0000 | |
| COPD | 45.9167 | 6.2317 to 338.3250 | **0.0002** |  | 21.7657 | N/A | 1.0000 | |  | | 24.668E+21 | 24.668E+21 to 24.668E+21 | **<0.0001** | |
| **BMI (kg/m2)** | 1.0035 | 0.9421 to 1.0689 | 0.9129 |  | 1.0091 | 0.9422 to 1.0808 | 0.7951 | |  | | 0.9990 | 0.9145 to 1.0914 | 0.9832 | |
| **Male** | 2.7600 | 1.6163 to 4.7129 | **0.0002** |  |  |  |  | |  | |  |  |  | |
| **Current smoker** | 1.58E+009 | N/A | 0.9972 |  |  |  |  | |  | | 1.4751E+66 | 1.4751E+66 to 1.4751E+66 | **<0.0001** | |
| **Smoking index (pack-year)** | 1.0645 | 1.0293 to 1.1009 | **0.0003** |  |  |  |  | |  | | 0.1459 | N/A | 0.9976 | |
| **FEV1 ≥ 80 % pred.** | 0.0592 | 0.0298 to 0.1174 | **<0.0001** |  |  |  |  | |  | | 0.0524 | 0.0236 to 0.1163 | **<0.0001** | |

YA, Younger asthmatics; EA, elderly asthmatics; COPD, chronic obstructive pulmonary disease; BMI, body mass index; FEV1, forced expiratory volume in one second; OR, odds ratio; aOR, adjusted odds ratio; CI, confidence interval; N/A, not available. *P* < 0.05 was shown in bold font. * Model 1 (n=253): adjusted by age, BMI, and disease entity (YA, EA, and COPD); # Model 2 (n=251): adjusted by age, BMI, disease entity (YA, EA, and COPD), smoking status (reference group = current smoker), smoking index (pack-years), Severity of disease (reference group = FEV1 ≥ 80 % pred. in spirometry). P < 0.05 was shown in bold font.
